# Supplementary material for: Comparative Effectiveness of Emergency Resuscitative Thoracotomy versus Closed Chest Compressions among Patients with Critical Blunt Trauma: A Nationwide Cohort Study in Japan
Source: PLoS One. 2016 Jan 14;11(1):e0145963. doi: 10.1371/journal.pone.0145963 (PMC4713157; doi:10.1371/journal.pone.0145963)
Supplement: S2 Table — (XLSX) [file pone.0145963.s002.xlsx]

## Sheet: S2 Table
	S2 Table. Characteristics of 24 hrs-survivor after critical blunt trauma conducted ERT
						Initial vital sign at ED
	Patient number	Age, y	Gender	Transferred from	Transporter	Systolic blood pressure, (mmHg)	Respiratory rate, (/min)	Heart rate, /min)	Glasgow Coma Scale	FAST	ISS	Main trauma (AIS≧3)	Outcome
	1	62	M	other hospital	Air ambulance	80	6	80	7	Positive	25	Mesenteric injury, lung contusion	Dischaged to home
	2	37	F	the scene	Ambulance	90	29	102	14	Positive	33	Heart laceration, lung contusion	Dischaged to home
	3	22	F	the scene	Ambulance	40	16	134	3	Positive	20	*Laceration of Vena cava or superior and thoracic portion of inferior	Dischaged to home
	4	3	M	the scene	Ambulance	110	34	179	7	Negative	25	Lung laceration	Dischaged to other hospital
	5	44	M	the scene	Ambulance	74	-	107	7	Positive	43	Heart laceration, multiple rib fracture, femoral fracture	Dischaged to other hospital
	6	58	M	the scene	Air ambulance	72	25	116	3	Negative	54	Multiple rib fracture, bilateral flail chest, subdural hematoma, subarachnoid hemorrage	Dischaged to other hospital
	7	62	M	-	-	124	25	124	7	Positive	9	Pericardial tamponade	Dischaged to other hospital
	8	24	M	the scene	Air ambulance	40	40	156	3	Negative	18	Femoral fracture, laceration of femoral vein	Dischaged to other hospital
	9	87	M	the scene	Ambulance	61	22	80	9	Positive	30	Heart laceration, lung injury, multiple rib fracture	Dischaged to other hospital
	10	37	M	other hospital	Ambulance	93	40	130	15	Positive	75	Thoracic aortic injury	Dischaged to other hospital
	11	81	M	the scene	Ambulance	40	0	84	6	Positive	29	Heart laceration	Dead in the hospital
	12	54	M	the scene	Ambulance	60	30	120	11	Positive	9	Splenic injury	Dead in the hospital
	13	48	M	the scene	Ambulance	116	38	114	3	Negative	41	Subdural hematoma, lung laceration	Dead in the hospital
	14	41	M	the scene	Ambulance	40	0	50	3	Positive	34	Multiple rib fractures, flail chest with lung contusion, subarachnoid hemorrhage, Femoral fracture	Dead in the hospital
	15	-	M	the scene	Ambulance	40	-	108	11	Positive	50	Pelvic fracture, lung laceration, multiple rib fracture, liver laceration	Dead in the hospital
	16	45	F	the scene	Air ambulance	93	44	129	14	Positive	43	Pelvic fracture, multiple rib fracture, *retroperitoneum hemorrage or hematoma	Dead in the hospital
	17	25	M	the scene	Ambulance	147	20	123	10	Positive	35	Splenic injury, cerebral contusion	Dead in the hospital
	18	32	M	the scene	Ambulance	132	0	0	3	not conducted	34	Multiple rib fracture, *brain swelling or edema, humerus open fracture	Dead in the hospital
	19	85	M	other hospital	Air ambulance	71	13	115	11	Positive	41	Lung contusion, *laceration of other named veins, gallbladder laceration, subarachnoid hemorrage, multiple rib fracture, pancreas laceration	Dead in the hospital
	20	48	F	-	-	40	12	120	3	Positive	41	Lung laceration, subdural hematoma	Unknown
	21	74	M	the scene	Ambulance	40	30	72	6	Negative	29	Pelvic fracture, amputation below knee	Unknown
	22	58	M	the scene	Air ambulance	80	0	136	3	Positive	50	Subdural hematoma, multiple rib fracture, bilateral flail chest, subarachnoid hemorrage	Unknown
	ERT: Emergency resuscitative thoracotomy
	CCC: Closed-chest compression
	ED: Emergency department
	FAST: Focused assessment with sonography for trauma
	AIS: Abbreviated injury scale
	ISS: Injury severity score
